# Supplementary material for: Preparation of redox-sensitive, core-crosslinked micelles self-assembled from mPEGylated starch conjugates: remarkable extracellular stability and rapid intracellular drug release
Source: Royal Society of Chemistry journal article supplement (doi:10.1039/c6ra06585f), 2016-01-01
Supplement: c6ra06585f1.pdf [file c6ra06585f1.pdf]

## Supporting Information

# Preparation of redox-sensitive, core-crosslinked micelles self-assembled from mPEGylated starch conjugates: remarkable extracellular stability and rapid intracellular drug release

*Mingjia Chen, Chunmei Gao, Shaoyu Li, Yuanmou Chen, Mingzhu Liu\**

State Key Laboratory of Applied Organic Chemistry, Key Laboratory of Nonferrous Metal Chemistry and Resources Utilization of Gansu Province, Department of Chemistry, Lanzhou University, Lanzhou 730000, People's Republic of China

\* Corresponding author. Tel: +86-931-8912387; fax: +86-931-8912582

E-mail address: mzliu@lzu.edu.cn (M. Liu)

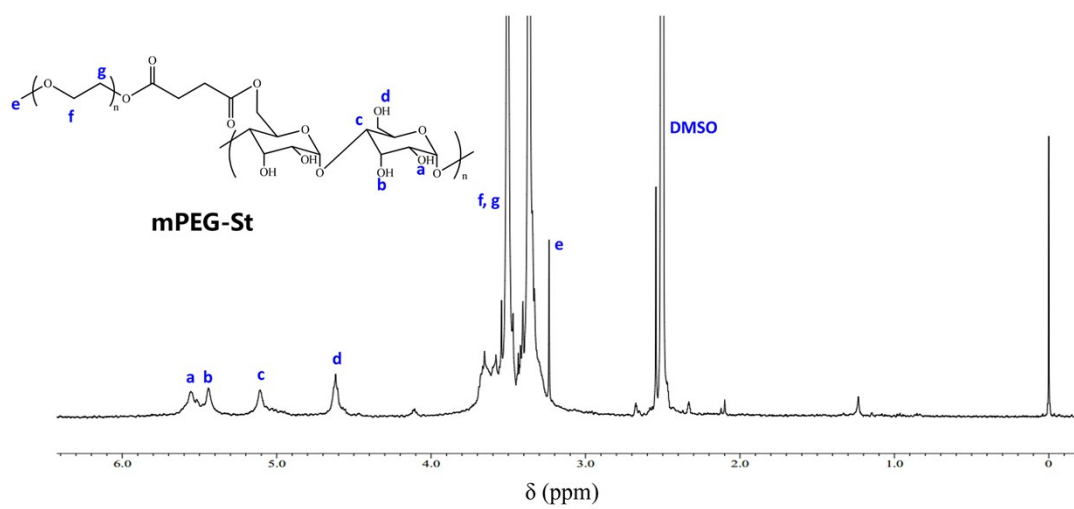

Fig. S1  $^1\text{H}$  NMR spectrum of mPEG-St in DMSO- $\text{d}_6$ .

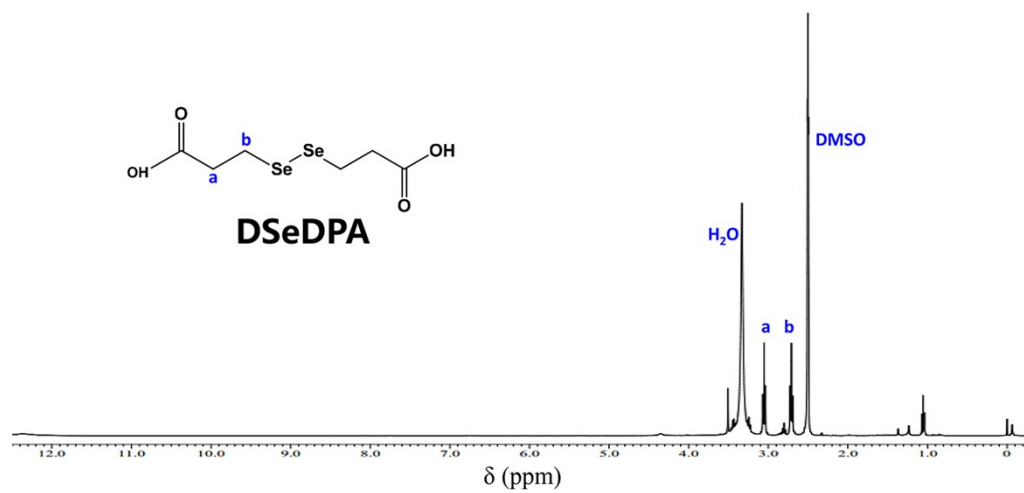

Fig. S2  $^1\text{H}$  NMR spectrum of DSeDPA in DMSO- $\text{d}_6$ .

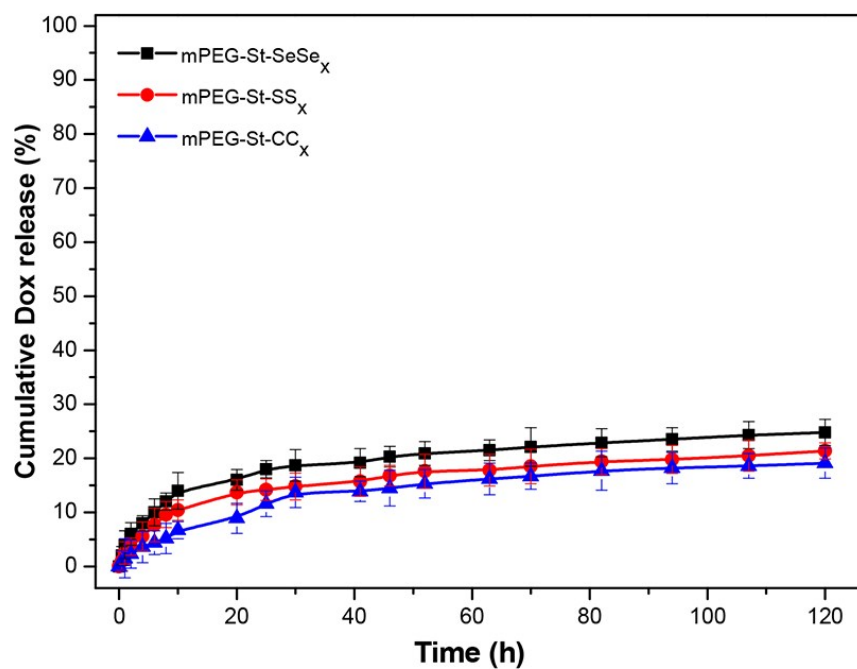

Fig. S3 *In vitro* drug release behavior of DOX-loaded mPEG-St-SeSe<sub>x</sub>, mPEG-St-SS<sub>x</sub> and mPEG-St-CC<sub>x</sub> micelles without GSH.
